# Supplementary material for: Risk Factors and Prognosis of Stroke in Gynecologic Cancer Patients
Source: MDPI journal article supplement (doi:10.3390/cancers15194895), 2023-10-09
Supplement: s1 [file s1]

**Table S1.** Prognostic factors associated with progression-free survival

| Variables                  | Univariate analysis |                 | Multivariate analysis |                 |
|----------------------------|---------------------|-----------------|-----------------------|-----------------|
|                            | HR (95% CI)         | <i>P</i> -value | HR (95% CI)           | <i>P</i> -value |
| Age (yr)                   | 1.019 (1.011–1.028) | < 0.001         | 1.010 (1.002–1.019)   | 0.017           |
| BMI (Kg/m <sup>2</sup> )   | 0.948 (0.921–0.976) | < 0.001         | 0.965 (0.938–0.994)   | 0.016           |
| DM                         |                     |                 |                       |                 |
| No                         | 1.00 (Reference)    |                 |                       |                 |
| Yes                        | 1.058 (0.771–1.452) | 0.727           |                       | 0.077           |
| HTN                        |                     |                 |                       |                 |
| No                         | 1.00 (Reference)    |                 |                       |                 |
| Yes                        | 1.052 (0.825–1.342) | 0.683           |                       | 0.733           |
| PTE/DVT                    |                     |                 |                       |                 |
| No                         | 1.00 (Reference)    |                 | 1.00 (Reference)      |                 |
| Yes                        | 2.060 (1.335–3.181) | 0.001           | 1.592 (1.016–2.494)   | 0.042           |
| Heart disease <sup>1</sup> |                     |                 |                       |                 |
| No                         | 1.00 (Reference)    |                 |                       |                 |
| Yes                        | 0.969 (0.712–1.319) | 0.842           |                       |                 |
| Fractures <sup>2</sup>     |                     |                 |                       |                 |
| No                         | 1.00 (Reference)    |                 |                       |                 |
| Yes                        | 0.949 (0.520–1.733) | 0.865           |                       |                 |
| Stroke onset               |                     |                 |                       |                 |
| No stroke                  | 1.00 (Reference)    |                 |                       |                 |
| Stroke before / after tx   | 1.289 (0.809–2.051) | 0.285           |                       |                 |
| Stroke during tx           | 1.714 (0.961–3.056) | 0.068           |                       |                 |
| Cancer type                |                     |                 |                       |                 |
| Cervix / Endometrial       | 1.00 (Reference)    |                 | 1.00 (Reference)      |                 |
| Ovary                      | 1.946 (1.551–2.441) | < 0.001         | 1.080 (0.834–1.399)   | 0.560           |
| Histological subtype       |                     |                 |                       |                 |
| Usual <sup>3</sup>         | 1.00 (Reference)    |                 | 1.00 (Reference)      |                 |
| Unusual                    | 1.626 (1.264–2.091) | < 0.001         | 1.581 (1.215–2.058)   | 0.001           |
| Histological grade         |                     |                 |                       |                 |
| Well/Moderate              | 1.00 (Reference)    |                 | 1.00 (Reference)      |                 |
| Poor                       | 2.662 (1.999–3.544) | < 0.001         | 1.941(1.258–2.995)    | 0.003           |
| Stage                      |                     |                 |                       |                 |
| I/II                       | 1.00 (Reference)    |                 | 1.00 (Reference)      |                 |
| III/IV                     | 3.773 (3.007–4.735) | < 0.001         | 3.412 (2.628–4.430)   | < 0.001         |

<sup>1</sup>Heart disease includes atrial fibrillation, coronary artery disease, dyslipidemia or heart failure. <sup>2</sup>Fractures include fractures located in the femur, fibular, patella, rib, or spine and total hip or knee replacement. <sup>3</sup>Usual type indicates squamous cell or adenocarcinoma in cervix, endometrioid carcinoma in endometrium, and serous or endometrioid carcinoma in ovary. Abbreviations: PFS, progression free survival; HR, hazard ratio; CI, confidence interval; BMI, body mass index; DM, diabetes mellitus; HTN, hypertension; PTE, pulmonary thromboembolism; DVT, deep vein thrombosis; Tx, treatment.
